# Supplementary material for: Mycobacterial IclR family transcriptional factor Rv2989 is specifically involved in isoniazid tolerance by regulating the expression of catalase encoding gene katG
Source: Royal Society of Chemistry journal article supplement (doi:10.1039/c6ra07733a), 2016-01-01
Supplement: c6ra07733a1.pdf [file c6ra07733a1.pdf]

**Mycobacterial IclR family transcriptional factor Rv2989 is specifically involved in isoniazid tolerance by regulating the expression of catalase encoding gene katG**

Qiming Li<sup>1\*</sup>, Tiwei Fu<sup>1\*</sup>, Chunyan Li<sup>1</sup>, Xiangyu Fan<sup>1,2</sup>, Jianping Xie<sup>1</sup>

<sup>1</sup>Institute of Modern Biopharmaceuticals, State Key Laboratory Breeding Base of Eco-Environment and Bio-Resource of the Three Gorges Area, Key Laboratory of Eco-environments in Three Gorges Reservoir Region, Ministry of Education, School of Life Sciences, Southwest University, Beibei, Chongqing 400715, China

<sup>2</sup>School of Biological Science and Technology, University of Jinan, Shandong 250022, China;

\*These authors are contribution equally to this work.

Address correspondence to jianping xie, [georgex@swu.edu.cn](mailto:georgex@swu.edu.cn)

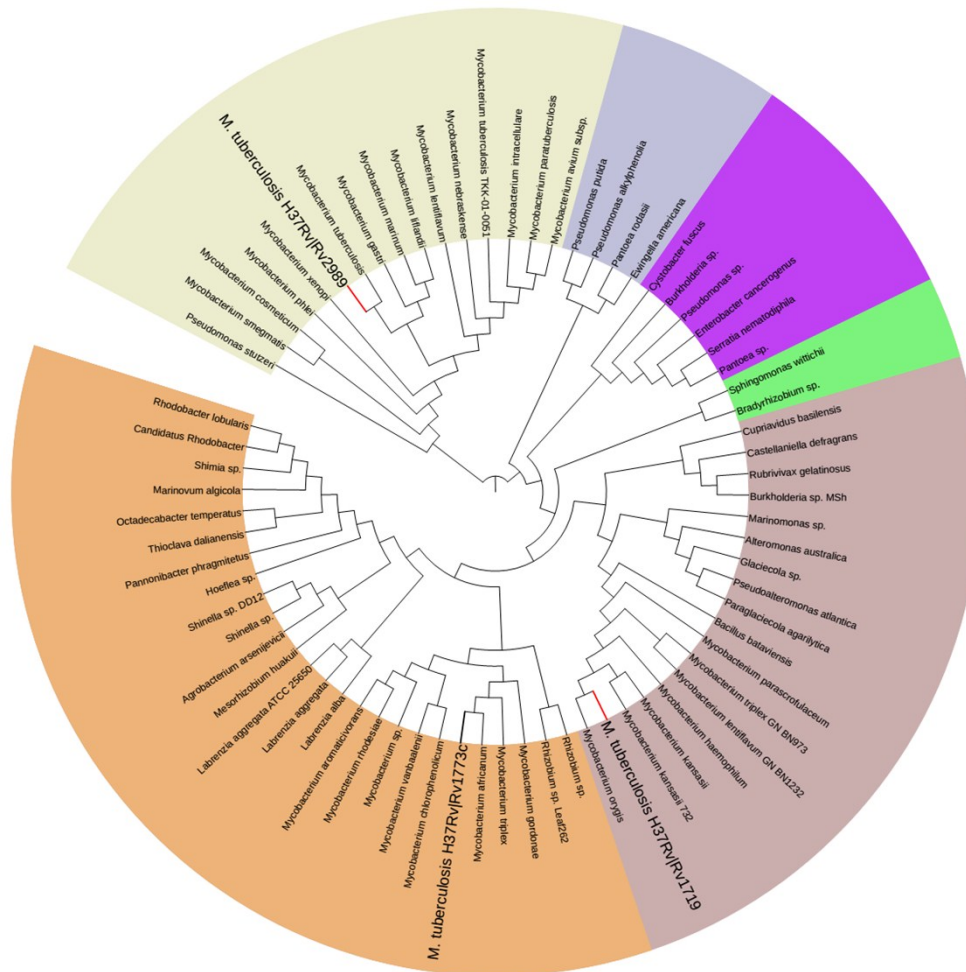

**Supplementary Figure. 1.** phylogenetic relationships of mycobacterial IclR family transcriptional factors in bacteria. The neighbor-joining tree (NJ) was constructed using MEGA 6.0 software.

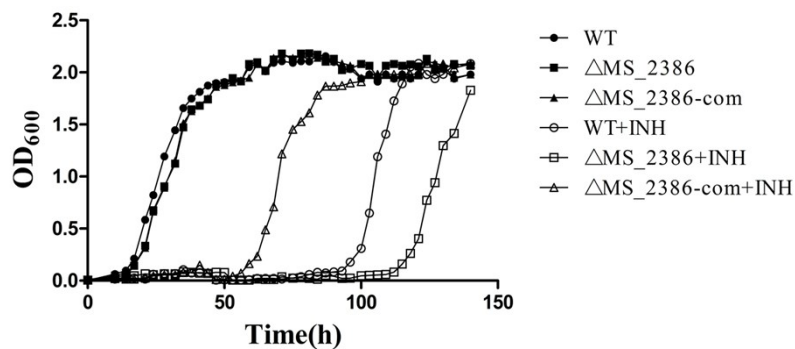

**Supplementary Figure. 2.** Growth curves of WT,  $\Delta$ MS<sub>2386</sub> and  $\Delta$ MS<sub>2386-com</sub> in M9 medium with or without INH (3 $\mu$ g/ml). The OD<sub>600</sub> were determined at an interval of 3h.

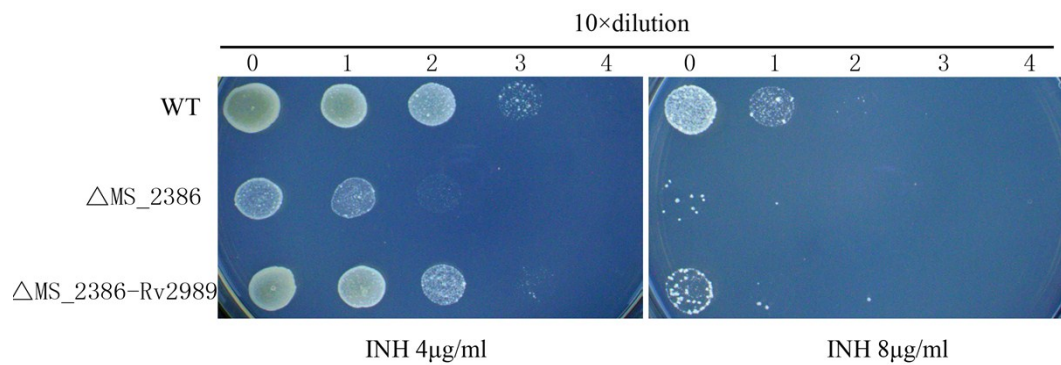

**Supplementary Figure. 3** Ten-fold serial dilutions of WT, MS\_2386 and  $\Delta$ MS\_2386-Rv2989 were spotted on Middlebrook 7H10 containing concentration of INH. Then the result was recorded when incubated at 37°C for 3 days.

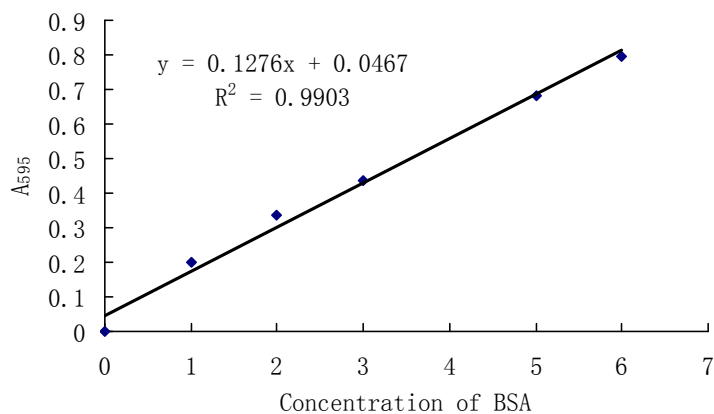

**Supplementary Figure. 4.** Standard curve for protein concentration determined.

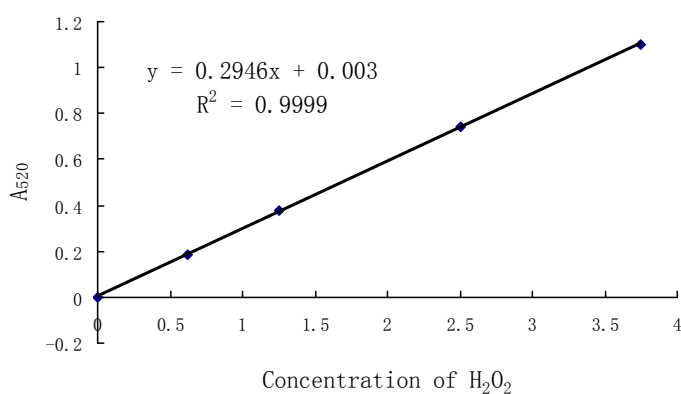

**Supplementary Figure. 5.** Standard curve for catalase activity determined.

**Supplementary Table 1.** Bacterial strains and plasmids used in this study

| Strains or plasmid          | Relevant characteristics                                                | Source or reference |
|-----------------------------|-------------------------------------------------------------------------|---------------------|
| <i>E. coli</i> DH5 $\alpha$ | <i>E. coli</i> strain used for cloning procedures                       | TaKaRa              |
| <i>M. smegmatis</i>         | Wild type(WT) strain <i>Mycobacterium smegmatis</i> mc <sup>2</sup> 155 | Our lab collection  |
| $\Delta$ MS_2386            | MSMEG_2386 deletion mutant of <i>M. smegmatis</i> mc <sup>2</sup> 155   | This study          |

|                       |                                                                                             |            |
|-----------------------|---------------------------------------------------------------------------------------------|------------|
| △MS_2386-com          | pMV261-2386 complemented with <i>MSMEG_2386</i> from <i>M.smegmatis</i> mc <sup>2</sup> 155 | This study |
| pMD19-T simple vector | Amp <sup>r</sup> , Used for TA clone construction recombinant plasmid                       | TaKaRa     |
| pJV53                 | replicative plasmid expressing two phage recombinases and conferring kanamycin resistance   | (1)        |
| PAL75                 | The plasmid carried excisable hyg cassette and weak mycobacterial promoters                 | (2)        |
| pMV261                | Mycobacterial shuttle vector with Kanamycin-resistance and HSP60 promotor                   | (3)        |
| pMV261-2386           | pMV261 carrying the <i>MSMEG_2386</i> gene                                                  | This study |

1. **Van Kessel JC, Hatfull GF.** 2007. Recombineering in Mycobacterium tuberculosis. Nature methods **4**:147-152.
2. **Cascioferro A, Boldrin F, Serafini A, Provvedi R, Palù G, Manganeli R.** 2010. Xer site-specific recombination, an efficient tool to introduce unmarked deletions into mycobacteria. Applied and environmental microbiology **76**:5312-5316.
3. **Stover C, De La Cruz V, Fuerst T, Burlein J, Benson L, Bennett L, Bansal G, Young J, Lee M, Hatfull GF.** 1991. New use of BCG for recombinant vaccines. Nature **351**:456-460.
